# Supplementary material
Source: publisher figshare collection journal article supplement (https://frontiersin.figshare.com/ndownloader/files/18070490)
Supplement: Supplementary file 1 [file 18070490]

Archive with 8 entries (8 files):
- Hydrographs/Tres Cruces_hydrograph.png
- Hydrographs/Tarapaca_hydrograph.png
- Hydrographs/Nazareth_hydrograph.png
- Hydrographs/Bacuri_hydrograph.png
- Hydrographs/Cuayare_hydrograph.png
- Hydrographs/Aceitico_hydrograph.png
- Hydrographs/Roncador_hydrograph.png
- Hydrographs/Calamar_hydrograph.png
