# Supplementary material
Source: publisher figshare collection journal article supplement (https://frontiersin.figshare.com/ndownloader/files/18070490)

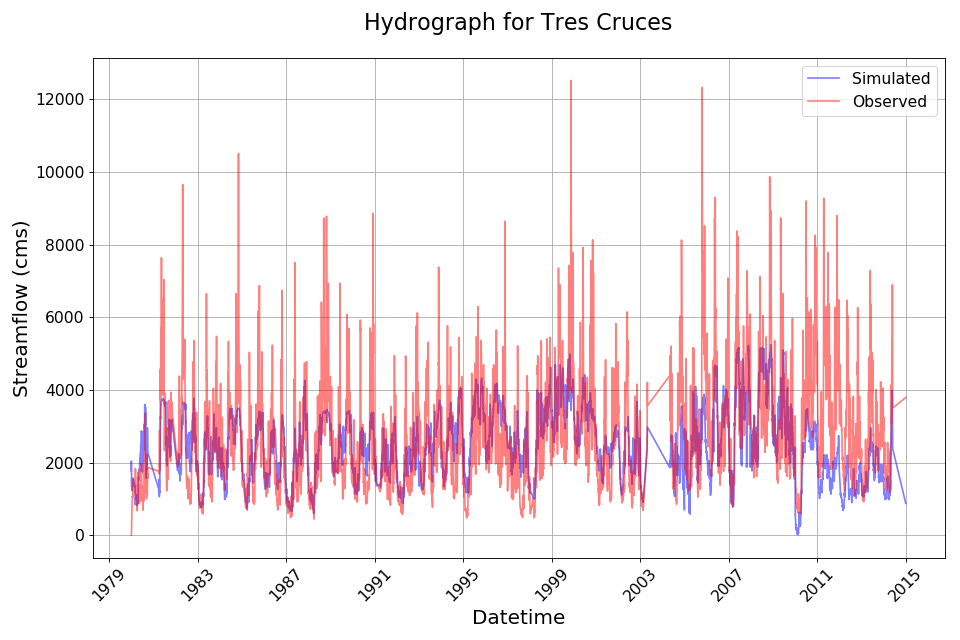

Supplement: Supplementary file 1 [file 18070490 › Hydrographs/Tres Cruces_hydrograph.png]

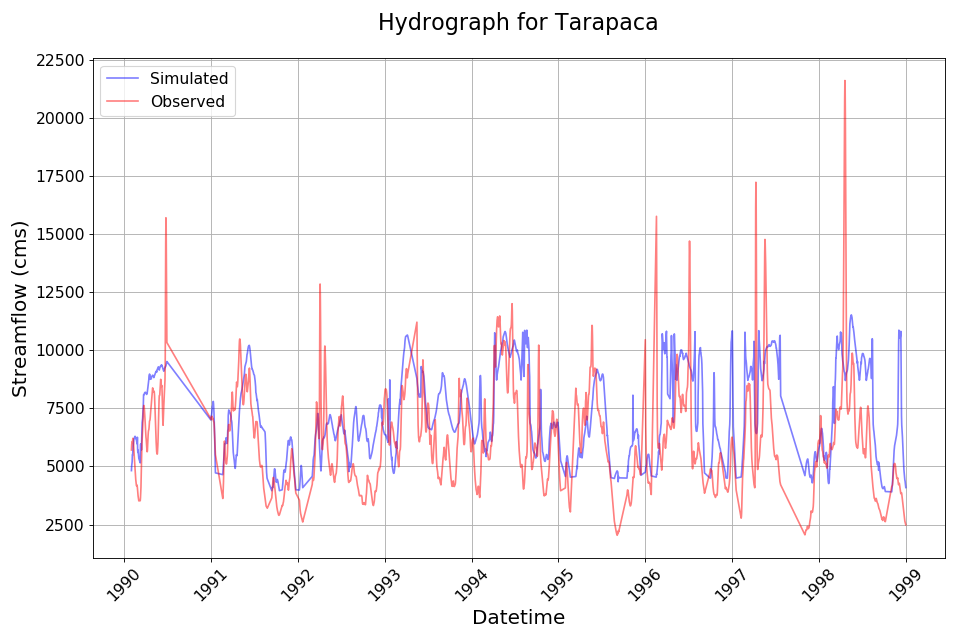

Supplement: Supplementary file 1 [file 18070490 › Hydrographs/Tarapaca_hydrograph.png]

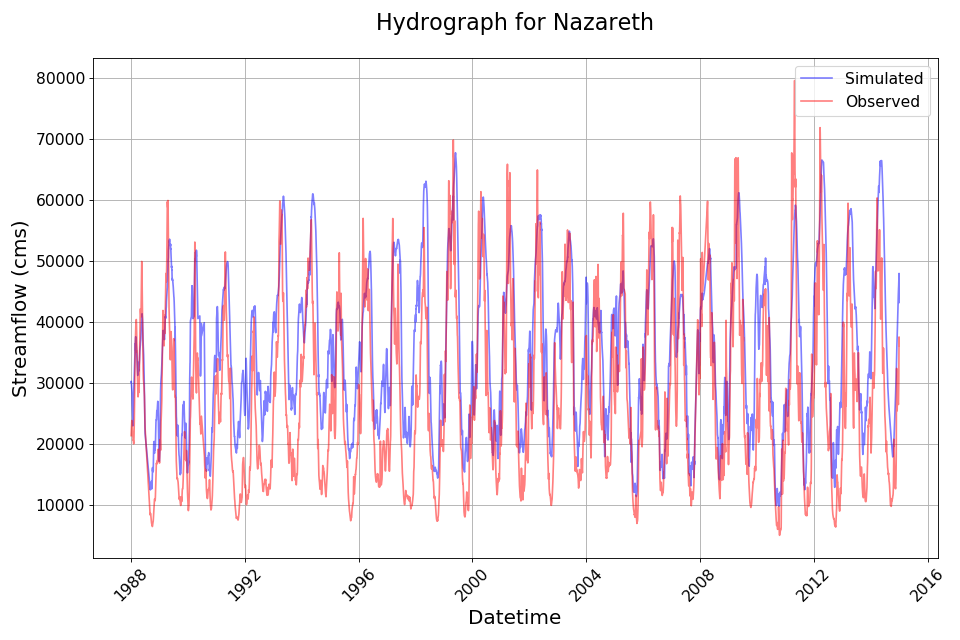

Supplement: Supplementary file 1 [file 18070490 › Hydrographs/Nazareth_hydrograph.png]

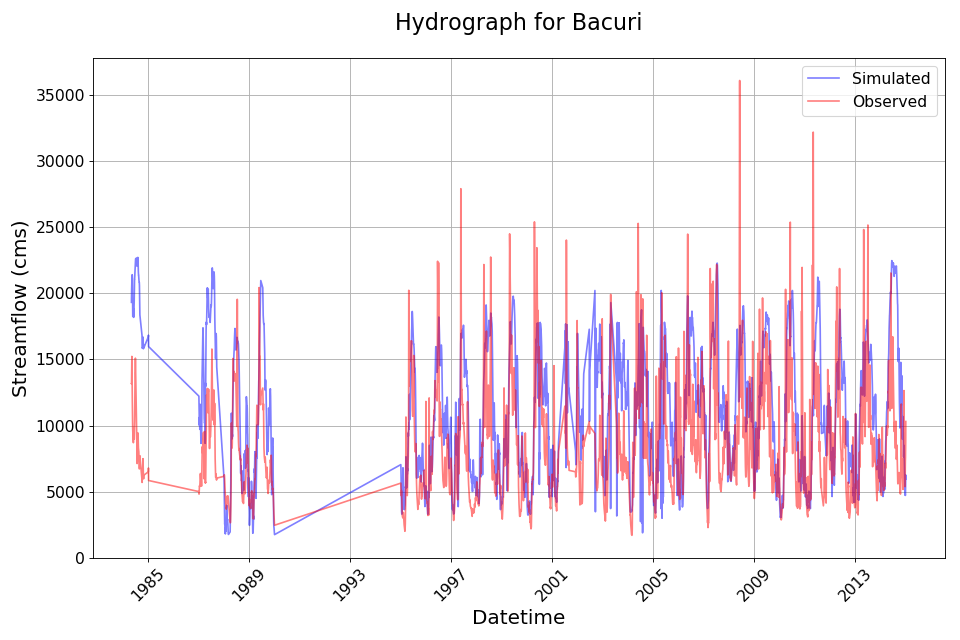

Supplement: Supplementary file 1 [file 18070490 › Hydrographs/Bacuri_hydrograph.png]

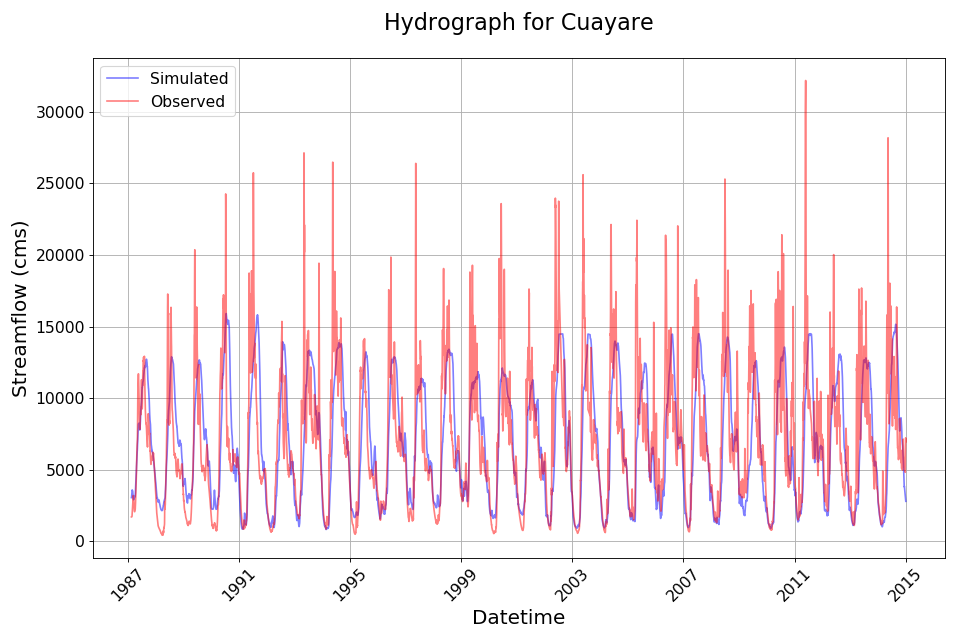

Supplement: Supplementary file 1 [file 18070490 › Hydrographs/Cuayare_hydrograph.png]

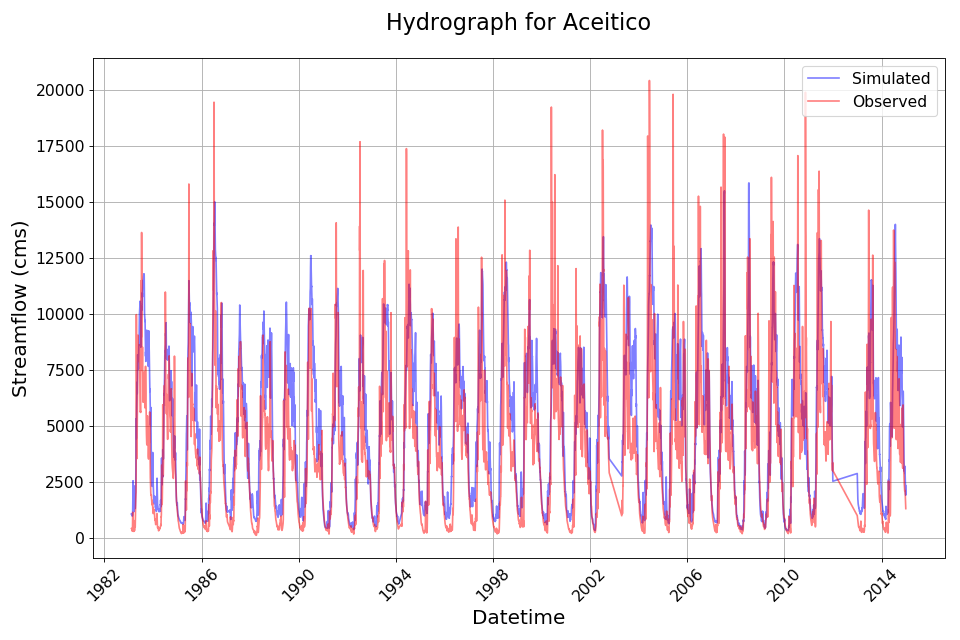

Supplement: Supplementary file 1 [file 18070490 › Hydrographs/Aceitico_hydrograph.png]

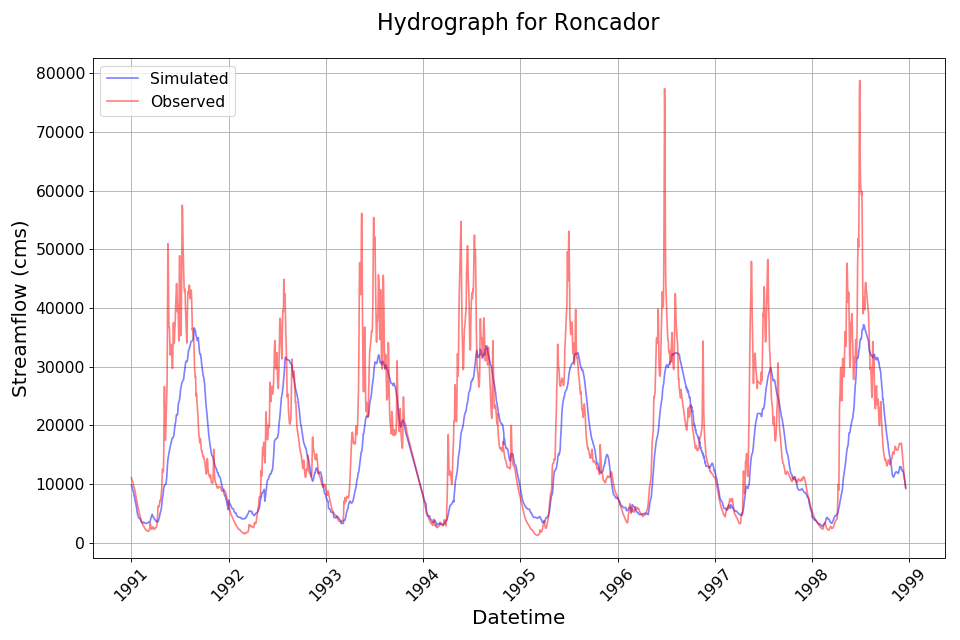

Supplement: Supplementary file 1 [file 18070490 › Hydrographs/Roncador_hydrograph.png]

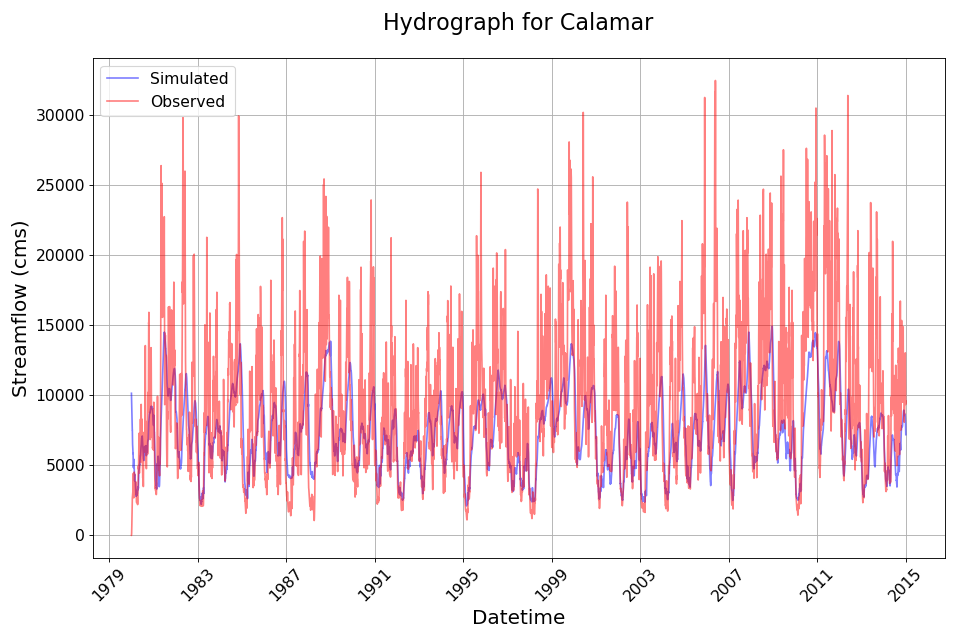

Supplement: Supplementary file 1 [file 18070490 › Hydrographs/Calamar_hydrograph.png]
